# Supplementary material
Source: HighWire-hosted journal article supplement (http://jpet.aspetjournals.org/highwire/filestream/151665/field_highwire_adjunct_files/0/1332_Supplemental_fig.pdf)
Supplement: 1332_Supplemental_fig.pdf [file 1332_Supplemental_fig.pdf]

# Mitochondrial dysfunction and pharmacodynamics of mitofusin activation in murine Charcot-Marie-Tooth disease type 2A

Antonietta Franco<sup>1</sup>, Xiawei Dang<sup>1,2</sup>, Lihong Zhang<sup>1,3</sup>, Perry B Molinoff<sup>4</sup>, Gerald W Dorn II<sup>1</sup>

Journal of Pharmacology and Experimental Therapeutics MS# JPET-AR-2022-001332

## SUPPLEMENTAL INFORMATION

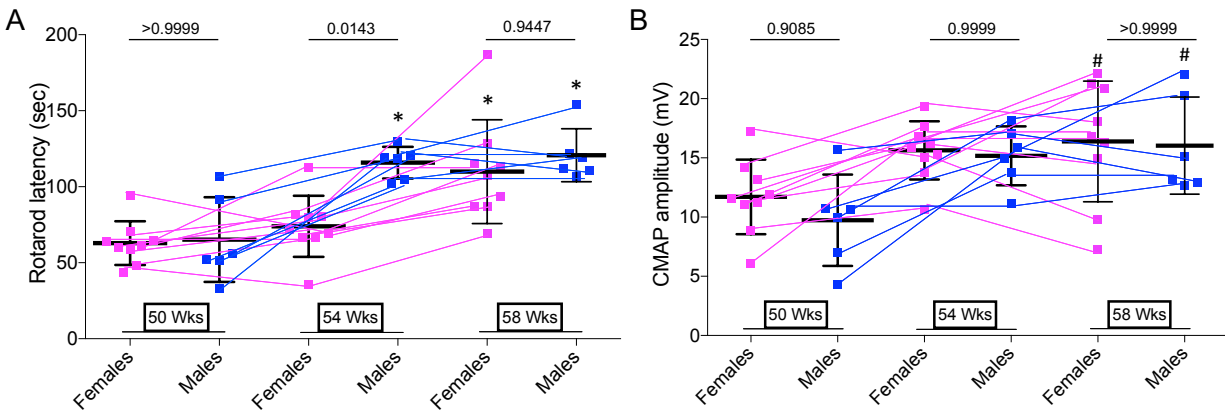

**Supplemental Figure 1.** Comparison of female vs male CMT2A mouse response to daily oral administration of the small molecule mitofusin activator *trans-MiM111*. **A.** Rotarod latency. **B.** CMAP amplitude. Each mouse is a square; pink is female and blue is male. Group mean data are shown as means±SD. P values (2-way ANOVA) for male vs female comparisons are shown at top. \* = p<0.05 vs same sex pretreatment baseline (50 week age); # = p<0.1 vs same sex pretreatment baseline (50 week age).
